# Supplementary material
Source: HighWire-hosted journal article supplement (https://srh.bmj.com/highwire/filestream/142169/field_highwire_adjunct_files/1/bmjsrh-2021-201265supp002_data_supplement.pdf)
Supplement: bmjsrh-2021-201265supp002_data_supplement.pdf [file bmjsrh-2021-201265supp002_data_supplement.pdf]

## Supplemental Material

Table S1. Baseline characteristics of clinics

| Clinic type                          | Non-migrants<br>n (%) | Foreign-born<br>migrants<br>n (%) | Second-generation<br>migrants<br>n (%) | p-value |
|--------------------------------------|-----------------------|-----------------------------------|----------------------------------------|---------|
| <b>Abortion clinic n = 4</b>         |                       |                                   |                                        |         |
| <i>Intervention</i>                  | 83/110 (75.5)         | 16/110 (14.5)                     | 11/110 (10.0)                          | 0.163   |
| <i>Control</i>                       | 70/110 (63.6)         | 24/110 (21.8)                     | 16/110 (14.5)                          |         |
| <b>Youth clinic n = 13</b>           |                       |                                   |                                        |         |
| <i>Intervention</i>                  | 222/276 (80.4)        | 27/276 (9.8)                      | 27/276 (9.8)                           | 0.568   |
| <i>Control</i>                       | 249/297 (83.8)        | 24/297 (8.1)                      | 24/297 (8.1)                           |         |
| <b>Maternal Health clinic n = 11</b> |                       |                                   |                                        |         |
| <i>Intervention</i>                  | 186/253 (73.5)        | 47/253 (18.6)                     | 20/253 (7.9)                           | 0.145   |
| <i>Control</i>                       | 200/249 (80.3)        | 31/249 (12.4)                     | 18/249 (7.2)                           |         |

Table S2. The most common countries of birth and number of years in Sweden for foreign-born migrants

|                           | Intervention<br>n=89*<br>n (%) | Control<br>n=79<br>n (%) | Total<br>n=168<br>n (%) |
|---------------------------|--------------------------------|--------------------------|-------------------------|
| <b>Countries of birth</b> |                                |                          |                         |
| Iran                      | 7 (7.9)                        | 5 (6.3)                  | 12 (7.1)                |
| Iraq                      | 4 (4.5)                        | 7 (8.9)                  | 11 (6.5)                |
| Poland                    | 5 (5.6)                        | 6 (7.6)                  | 11 (6.5)                |
| Finland                   | 7 (7.9)                        | 4 (5.1)                  | 11 (6.5)                |
| Other                     | 66 (74.2)                      | 57 (72.2)                | 123 (73.2)              |
| <b>Years in Sweden</b>    |                                |                          |                         |
| Median (IQR)              | 10 (6-17)                      | 12 (8-17.25)             | 11 (6-17)               |

\*1 missing data

Table S3. Cost impact on contraceptive choice and LARC impact on choice if all contraceptives were for free, divided by the three participant groups

|                                            | Non-migrants<br>n (%) | Foreign-born<br>migrants<br>n (%) | Second-generation<br>migrants<br>n (%) | Total<br>n (%) | p-value |
|--------------------------------------------|-----------------------|-----------------------------------|----------------------------------------|----------------|---------|
| <b>Cost impact on contraceptive choice</b> |                       |                                   |                                        |                |         |
| <i>Intervention</i>                        |                       |                                   |                                        |                |         |
| Yes                                        | 67 (13.6)             | 17 (18.9)                         | 3 (5.2)                                | 87 (13.6)      | 0.059   |
| No                                         | 424 (86.4)            | 73 (81.1)                         | 55 (94.8)                              | 552 (86.4)     |         |
| <i>Control</i>                             |                       |                                   |                                        |                |         |
| Yes                                        | 57 (11.0)             | 9 (11.4)                          | 7 (12.1)                               | 73 (11.1)      | 0.966   |
| No                                         | 462 (89.0)            | 70 (88.6)                         | 51 (87.9)                              | 583 (88.9)     |         |
| <b>LARC impact on choice</b>               |                       |                                   |                                        |                |         |
| <i>Intervention</i>                        |                       |                                   |                                        |                |         |
| Yes                                        | 192 (39.1)            | 42 (46.7)                         | 25 (43.1)                              | 259 (40.5)     | 0.372   |

|                |            |           |           |            |       |
|----------------|------------|-----------|-----------|------------|-------|
| No             | 299 (60.9) | 48 (53.3) | 33 (56.9) | 380 (59.5) |       |
| <i>Control</i> |            |           |           |            |       |
| Yes            | 156 (30.1) | 29 (36.7) | 17 (29.3) | 202 (30.8) | 0.475 |
| No             | 363 (69.9) | 50 (63.3) | 41 (70.7) | 454 (69.2) |       |

Table S4. Pregnancy rates at FU3 and FU12 divided by the three participant groups and allocated group

| Pregnancy           | Non-migrants<br>n (%) | Foreign-born<br>migrants<br>n (%) | Second-generation<br>migrants<br>n (%) | Total<br>n (%) | p-value |
|---------------------|-----------------------|-----------------------------------|----------------------------------------|----------------|---------|
| <b>FU3</b>          |                       |                                   |                                        |                |         |
| <i>Intervention</i> |                       |                                   |                                        |                |         |
| Yes                 | 5 (1.0)               | 1 (1.2)                           | 1 (1.8)                                | 7 (1.1)        | 0.634*  |
| No                  | 475 (99.0)            | 85 (98.8)                         | 55 (98.2)                              | 615 (98.9)     |         |
| <i>Control</i>      |                       |                                   |                                        |                |         |
| Yes                 | 10 (2.0)              | 2 (2.7)                           | 4 (7.0)                                | 16 (2.5)       | 0.066*  |
| No                  | 499 (98.0)            | 71 (97.3)                         | 53 (93.0)                              | 623 (97.5)     |         |
| <b>FU12</b>         |                       |                                   |                                        |                |         |
| <i>Intervention</i> |                       |                                   |                                        |                |         |
| Yes                 | 27 (5.7)              | 5 (5.9)                           | 6 (10.7)                               | 38 (6.2)       | 0.322*  |
| No                  | 449 (94.3)            | 80 (94.1)                         | 50 (89.3)                              | 579 (93.8)     |         |
| <i>Control</i>      |                       |                                   |                                        |                |         |
| Yes                 | 39 (7.7)              | 9 (12.3)                          | 5 (8.9)                                | 53 (8.3)       | 0.334*  |
| No                  | 469 (92.3)            | 64 (87.7)                         | 51 (91.1)                              | 584 (91.7)     |         |

\*Fisher's exact test
